# Supplementary material for: Bathurst Burr (Xanthium spinosum) Powder—A New Natural Effective Adsorbent for Crystal Violet Dye Removal from Synthetic Wastewaters
Source: MDPI journal article supplement (doi:10.3390/ma14195861), 2021-10-07
Supplement: s1 [file s1]

## Article

# Bathurst Burr (*Xanthium Spinosum*) Powder—a New Natural Effective Adsorbent for Crystal Violet Dye Removal from Synthetic Wastewaters

Giannin Mosoarca <sup>1</sup>, Cosmin Vancea <sup>1,\*</sup>, Simona Popa <sup>1,\*</sup> and Sorina Boran <sup>1</sup>

Faculty of Industrial Chemistry and Environmental Engineering, Politehnica University Timisoara, Bd. V. Parvan, No. 6, 300223, Timisoara, Romania; giannin.mosoarca@upt.ro (G.M.); sorina.boran@upt.ro (S.B.)

\* Correspondence: cosmin.vancea@upt.ro, Tel.: +40256404194 (C.V.); simona.popa@upt.ro, Tel.: +40256404212 (S.P.)

**Citation:** Mosoarca, G.; Vancea, C.; Popa, S.; Boran, S. Bathurst Burr (*Xanthium Spinosum*) Powder a New Natural Effective Adsorbent for Crystal Violet Dye Removal from Synthetic Wastewaters. *Materials* **2021**, *14*, x. <https://doi.org/10.3390/xxxxx>

Academic Editor: Dimitrios Papoulis

Received: 23 August 2021

Accepted: 5 October 2021

Published:

**Publisher's Note:** MDPI stays neutral with regard to jurisdictional claims in published maps and institutional affiliations.

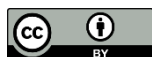

**Copyright:** © 2021 by the authors. Licensee MDPI, Basel, Switzerland. This article is an open access article distributed under the terms and conditions of the Creative Commons Attribution (CC BY) license (<http://creativecommons.org/licenses/by/4.0/>).

**Table S1.** Experimental layout of L27 orthogonal array and results obtained for removal efficiency and S/N ratios.

| pH | Ionic Strength | Adsorbent Dose | Initial Dye Concentration | Time | Temperature | Removal Efficiency | S/N Ratio |
|----|----------------|----------------|---------------------------|------|-------------|--------------------|-----------|
| 2  | 0              | 0.5            | 50                        | 5    | 285         | 15.6               | 23.86     |
| 2  | 0              | 0.5            | 50                        | 20   | 304         | 18.68              | 25.42     |
| 2  | 0              | 0.5            | 50                        | 40   | 311         | 20.25              | 26.12     |
| 2  | 0.1            | 2              | 150                       | 5    | 285         | 24.16              | 27.66     |
| 2  | 0.1            | 2              | 150                       | 20   | 304         | 28.92              | 29.22     |
| 2  | 0.1            | 2              | 150                       | 40   | 311         | 31.35              | 29.92     |
| 2  | 0.25           | 3              | 250                       | 5    | 285         | 21.98              | 26.84     |
| 2  | 0.25           | 3              | 250                       | 20   | 304         | 26.32              | 28.40     |
| 2  | 0.25           | 3              | 250                       | 40   | 311         | 28.53              | 29.10     |
| 6  | 0              | 3              | 150                       | 5    | 304         | 72.99              | 37.26     |
| 6  | 0              | 3              | 150                       | 20   | 311         | 88.95              | 38.98     |
| 6  | 0              | 3              | 150                       | 40   | 285         | 85.04              | 38.59     |
| 6  | 0.1            | 0.5            | 250                       | 5    | 304         | 30.14              | 29.58     |
| 6  | 0.1            | 0.5            | 250                       | 20   | 311         | 36.73              | 31.30     |
| 6  | 0.1            | 0.5            | 250                       | 40   | 285         | 35.12              | 30.91     |
| 6  | 0.25           | 2              | 50                        | 5    | 304         | 57.65              | 35.21     |
| 6  | 0.25           | 2              | 50                        | 20   | 311         | 70.25              | 36.93     |
| 6  | 0.25           | 2              | 50                        | 40   | 285         | 67.16              | 36.54     |
| 12 | 0              | 2              | 250                       | 5    | 311         | 72.86              | 37.24     |
| 12 | 0              | 2              | 250                       | 20   | 285         | 78.3               | 37.87     |
| 12 | 0              | 2              | 250                       | 40   | 304         | 83.38              | 38.42     |
| 12 | 0.1            | 3              | 50                        | 5    | 311         | 70.37              | 36.94     |
| 12 | 0.1            | 3              | 50                        | 20   | 285         | 75.62              | 37.57     |
| 12 | 0.1            | 3              | 50                        | 40   | 304         | 80.53              | 38.11     |
| 12 | 0.25           | 0.5            | 150                       | 5    | 311         | 35.87              | 31.09     |
| 12 | 0.25           | 0.5            | 150                       | 20   | 285         | 38.54              | 31.71     |
| 12 | 0.25           | 0.5            | 150                       | 40   | 304         | 41.04              | 32.26     |

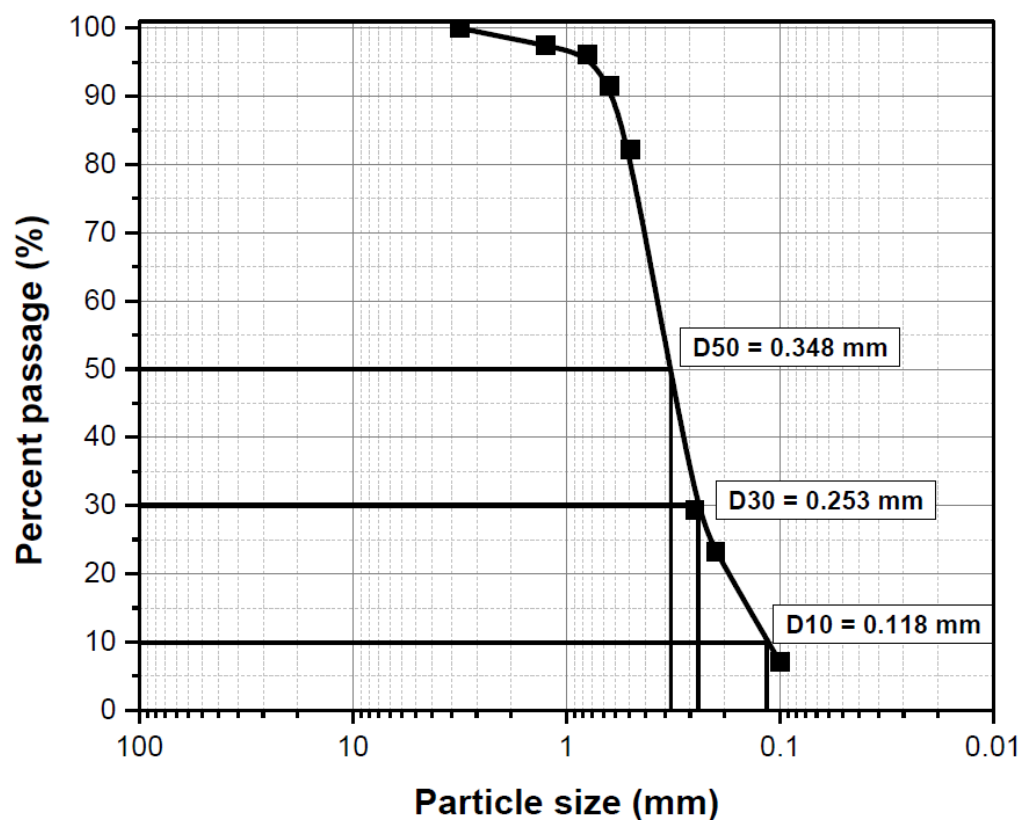

Figure S1. The particle size distribution of the bathurst burr powder.

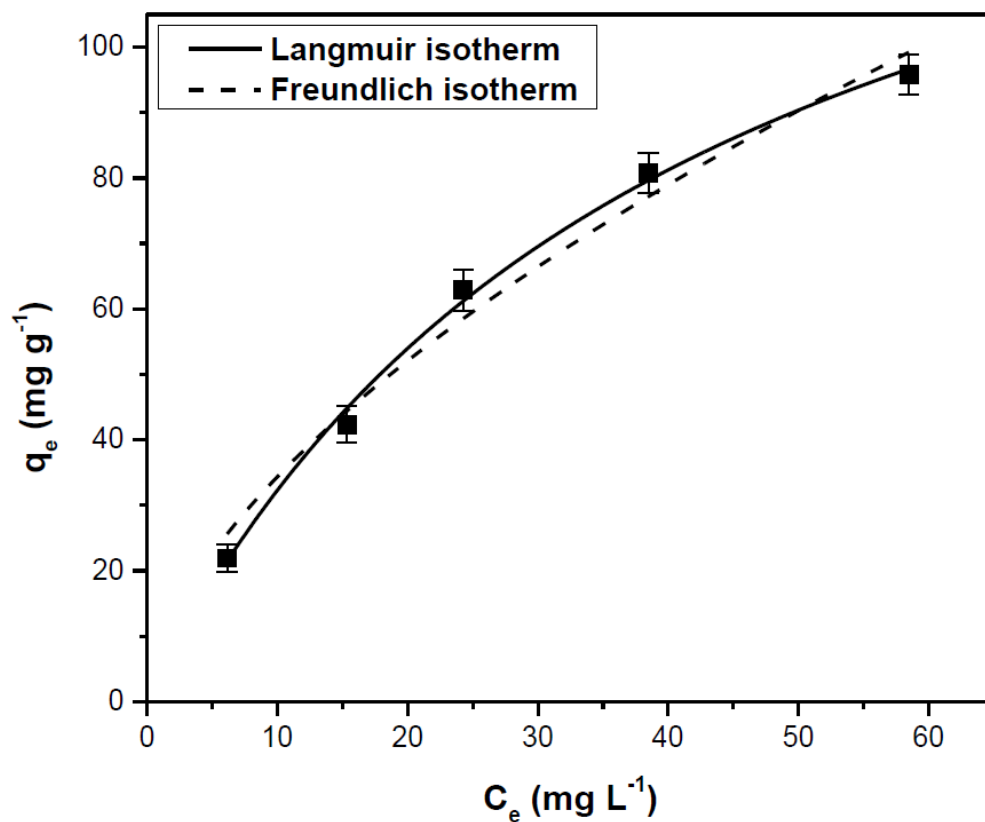

Figure S2. Langmuir and Freundlich adsorption isotherms (non-linear forms) for the crystal violet adsorption onto bathurst burr powder.

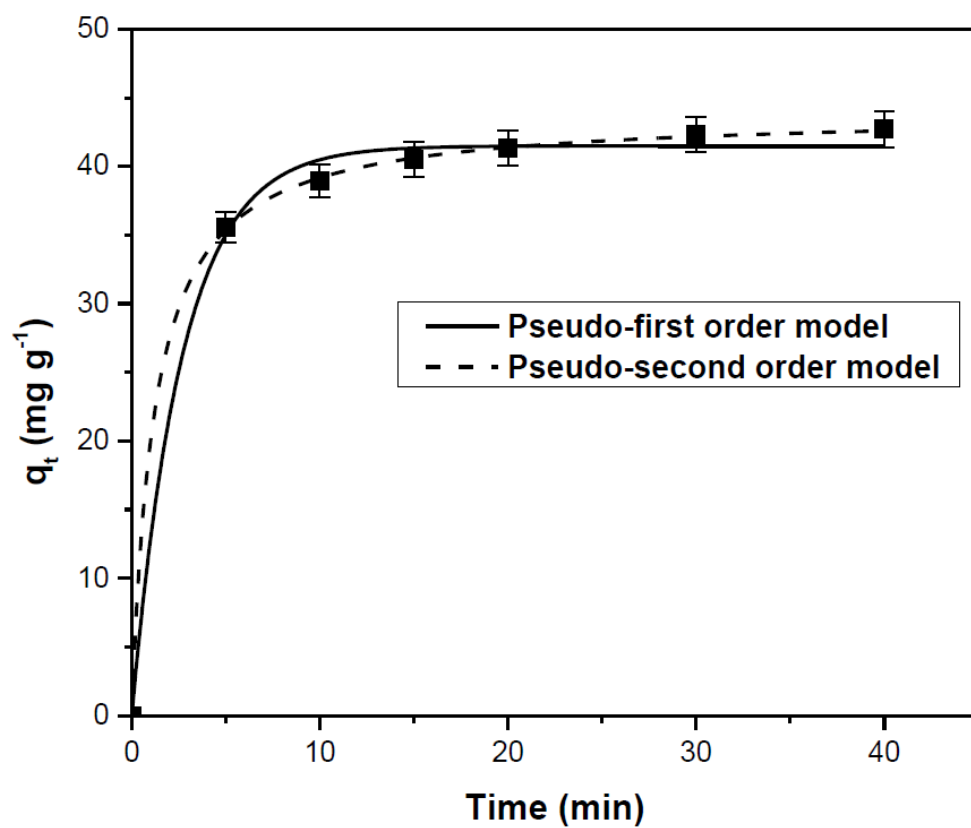

**Figure S3.** Pseudo-first-order and pseudo-second-order kinetic models (non-linear forms) for the crystal violet adsorption onto bathurst burr powder.

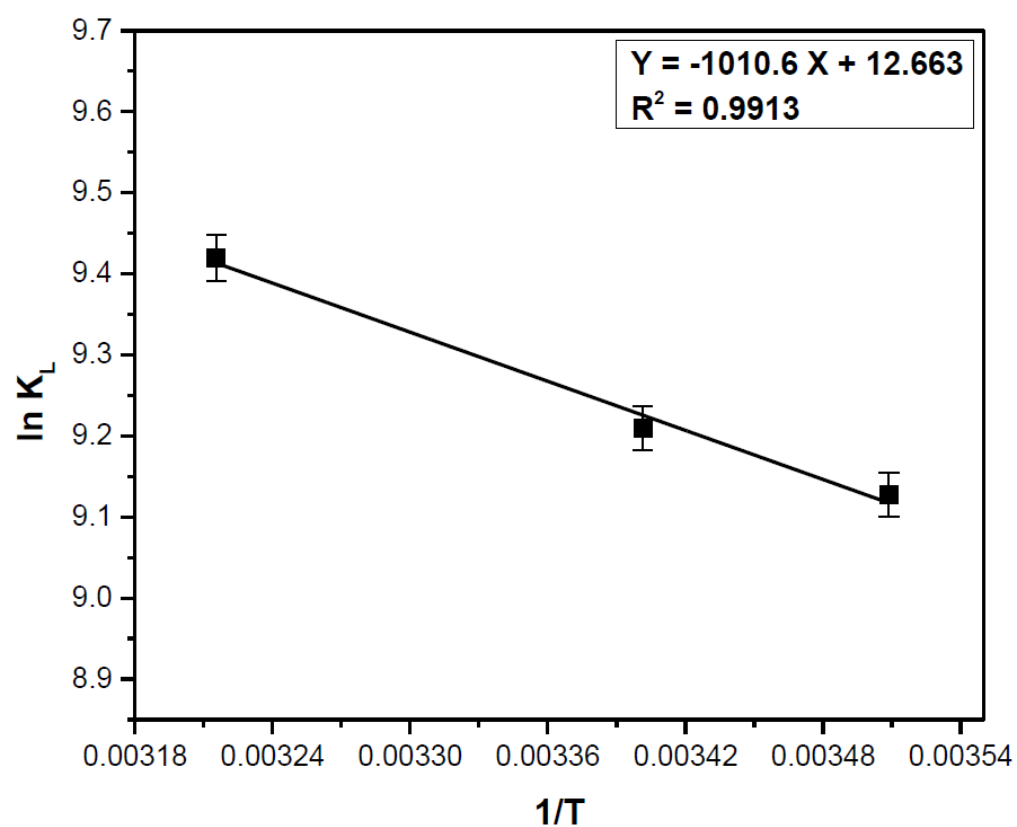

**Figure S4.** Plot of  $\ln K_L$  vs.  $1/T$  for the crystal violet adsorption onto bathurst burr powder.

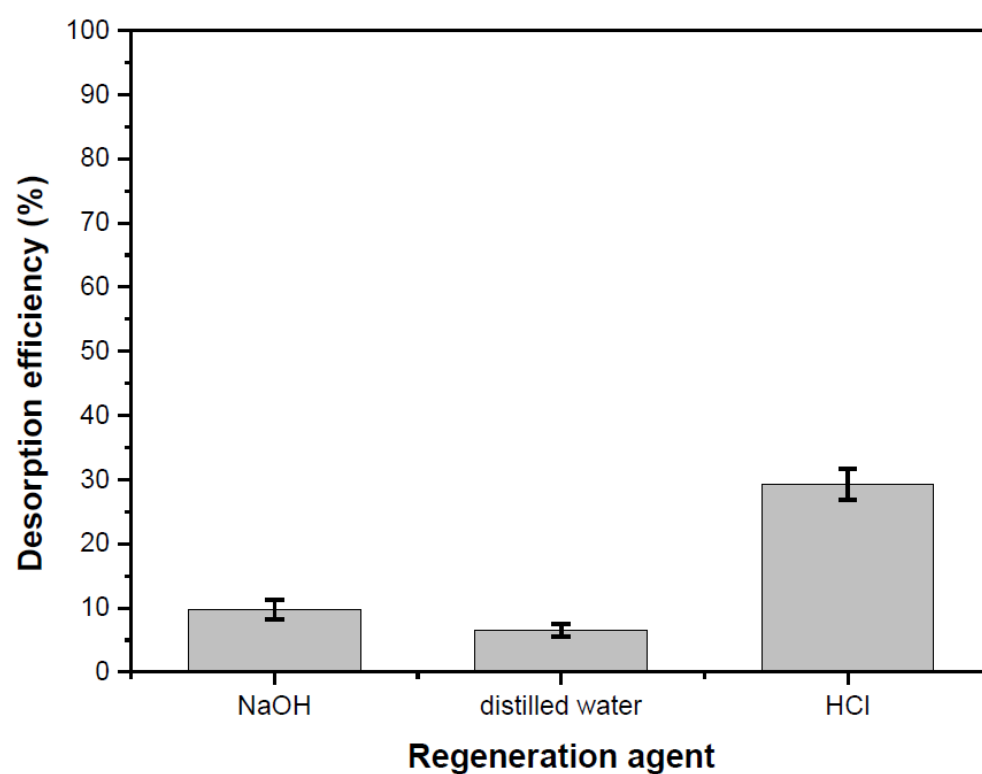

**Figure S5.** The desorption efficiencies of crystal violet dye in different media.
